# Supplementary material for: Templated Synthesis of Diamond Nanopillar Arrays Using Porous Anodic Aluminium Oxide (AAO) Membranes
Source: MDPI journal article supplement (doi:10.3390/nano13050888), 2023-02-27
Supplement: s1 [file s1]

## Supporting Information for

### **Templated synthesis of diamond nanopillar arrays using porous anodic aluminium oxide (AAO) membranes**

Chenghao Zhang <sup>1,2</sup>, Zhichao Liu <sup>2</sup>, Chun Li <sup>1</sup>, Jian Cao <sup>1</sup> and Josephus G. Buijnsters <sup>2,\*</sup>

<sup>1</sup> State Key Laboratory of Advanced Welding and Joining, Harbin Institute of Technology, Harbin 150001, China

<sup>2</sup> Department of Precision and Microsystems Engineering, Research Group of Micro and Nano Engineering, Delft University of Technology, Mekelweg 2, 2628 CD Delft, the Netherlands

\* Correspondence: [j.g.buijnsters@tudelft.nl](mailto:j.g.buijnsters@tudelft.nl) (J.G.B.)

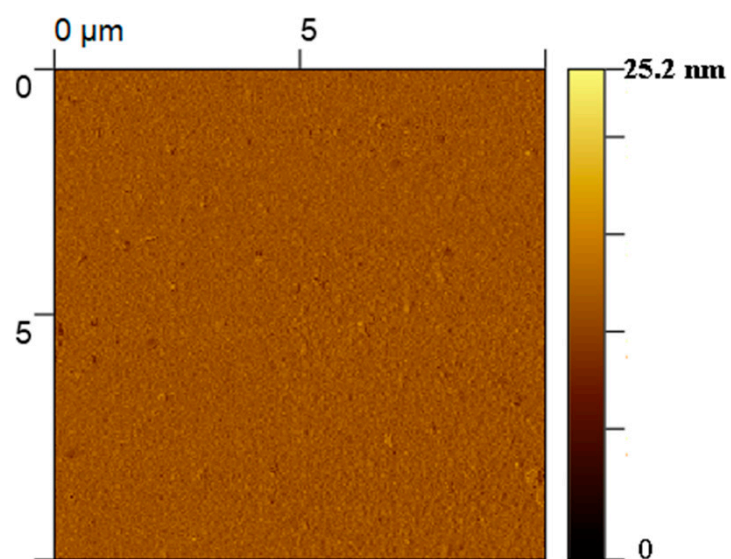

Figure S1. AFM topographic image ( $10 \times 10 \mu\text{m}^2$ ) of the nucleation side of the diamond sheets.

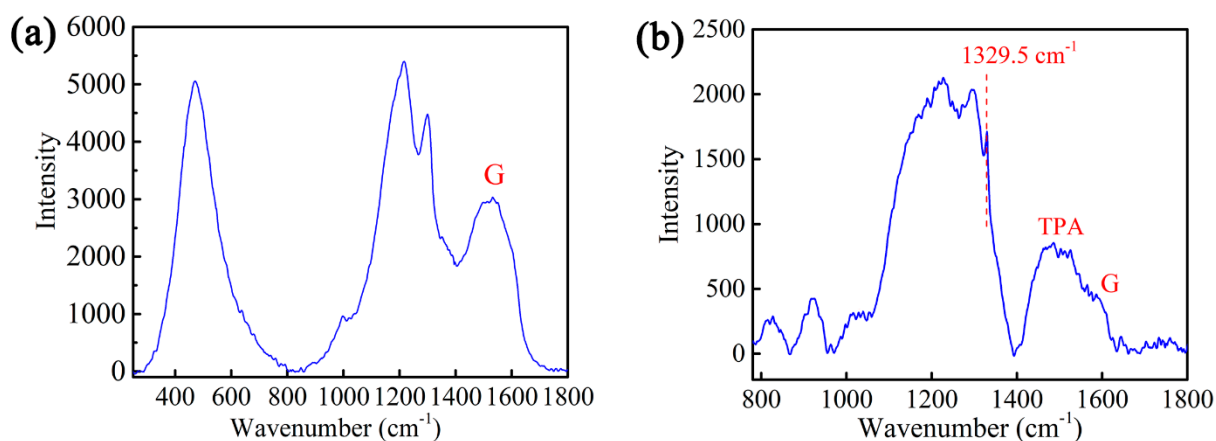

Figure S2. Raman spectra recorded from (a) nucleation side of the diamond sheet and (b) as-grown diamond nanopillars with  $\sim 70$  nm diameter before removal of the AAO template.

### Assignment of Raman peaks

The peaks around  $1310$  and  $1329.5$   $\text{cm}^{-1}$  are the distorted and shapely diamond one-phonon lines, characteristic of heavily B-doped and undoped diamond, respectively. The bands around  $500$   $\text{cm}^{-1}$  and  $1200$   $\text{cm}^{-1}$  can be assigned to a combination of electronic Raman scattering and a Fano-shaped band, and the maximum of phonon density of states, respectively. The G band at  $1580$   $\text{cm}^{-1}$  originates from  $\text{sp}^2$  carbon in the grain boundaries and the signal at about  $1480$   $\text{cm}^{-1}$  is related to trans-polyacetylene (TPA).

Note that the diamond sheet (Figure S2a) and grown diamond pillars (Figure S2b) were deliberately chosen to be of different composition, namely heavily boron-doped diamond (BDD) and undoped nanocrystalline diamond, respectively. As a consequence, the Raman spectral features clearly marked the distinction between both diamond material types, even for such tiny pillars.

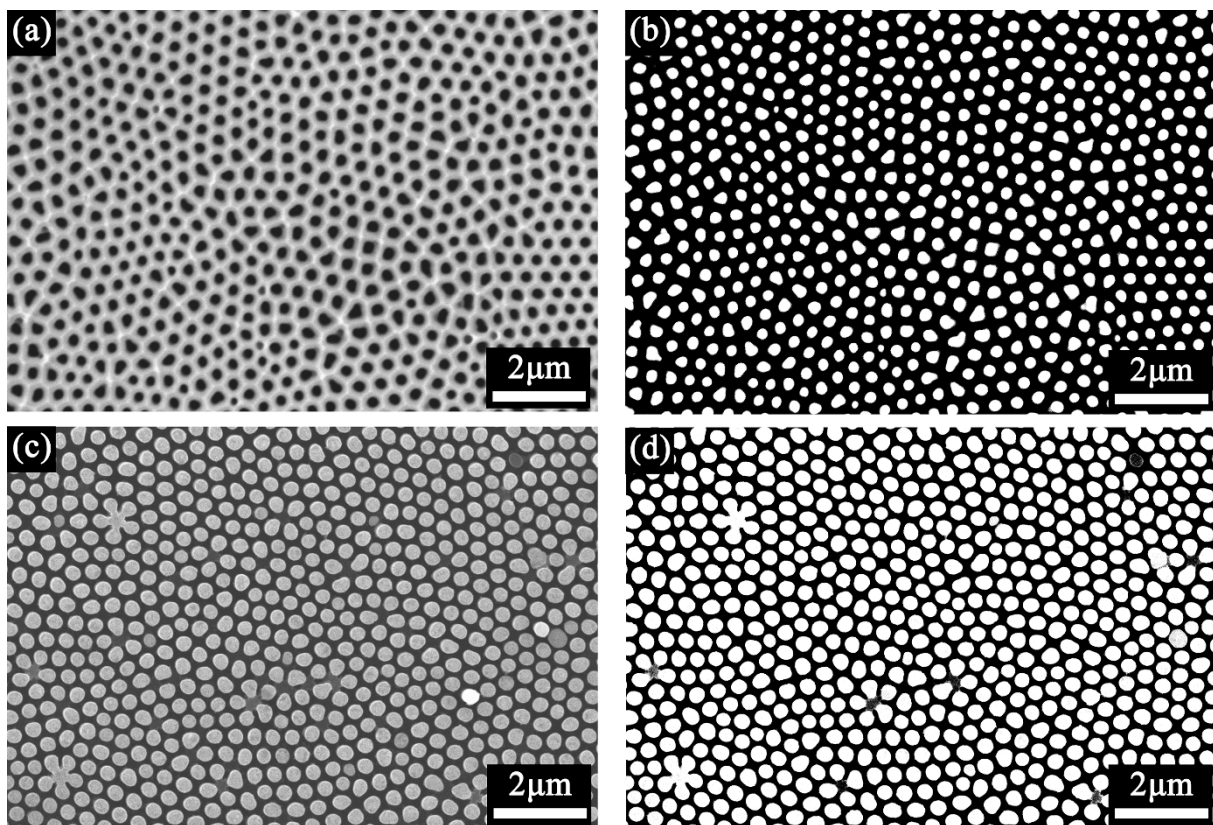

Figure S3. Conversion of SEM images (left column) into binary representations (right column) of AAO template (a,b) and diamond pillars (c,d).

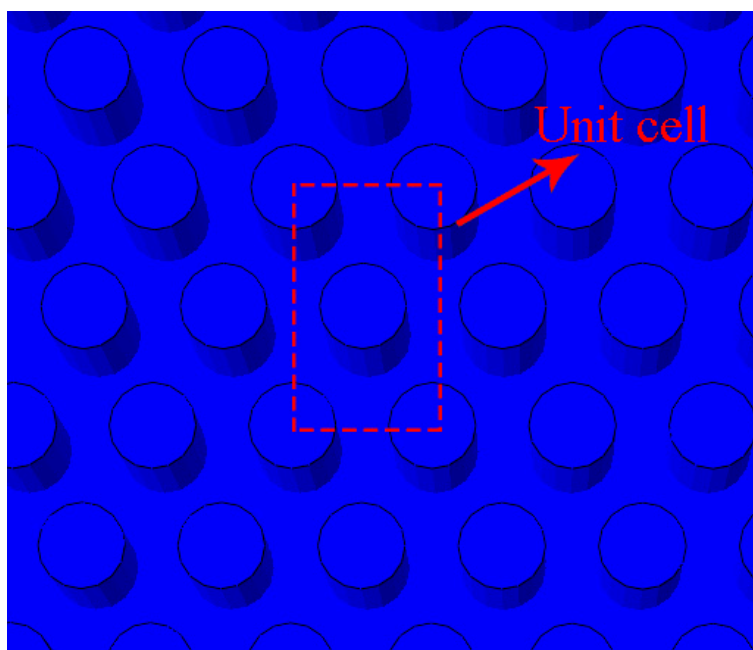

Figure S4. Finite element model of the diamond pillar array with the unit cell indicated in red.

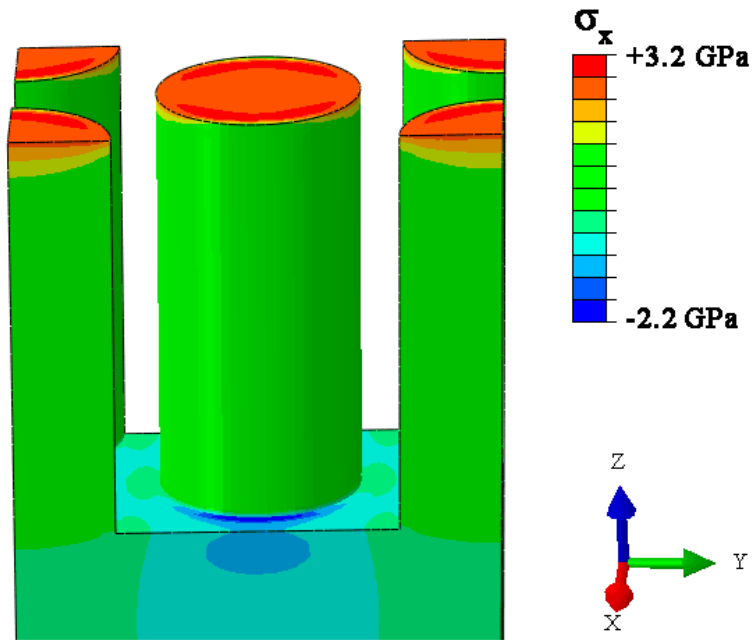

Figure S5. Stress modelling data showing the contour plot of the residual stress along the x-axis in the diamond pillars after the cooling down and before AAO removal. For reasons of clarity, the AAO skeleton is not shown.

Table S1. Material performance parameters of AAO skeleton in FEM.

| Temperature<br>(°C) | Young's modulus<br>(GPa) [57] | Poisson's<br>ratio [57] | Temperature<br>(°C) | Thermal expansion<br>coefficient ( $10^{-6} \text{ K}^{-1}$ ) [58] |
|---------------------|-------------------------------|-------------------------|---------------------|--------------------------------------------------------------------|
| 20-900              | 253                           | 0.24                    | 100                 | 12.401                                                             |
|                     |                               |                         | 200                 | 12.592                                                             |
|                     |                               |                         | 300                 | 13.110                                                             |
|                     |                               |                         | 400                 | 13.009                                                             |
|                     |                               |                         | 500                 | 12.950                                                             |
|                     |                               |                         | 600                 | 12.690                                                             |
|                     |                               |                         | 700                 | 12.507                                                             |
|                     |                               |                         | 800                 | 12.042                                                             |

Table S2. Material performance parameters of diamond in FEM.

| Temperature<br>(°C) | Young's modulus<br>(GPa) [59] | Poisson's<br>ratio [60] | Temperature<br>(°C) | Thermal expansion<br>coefficient ( $10^{-6} \text{ K}^{-1}$ ) [61] |
|---------------------|-------------------------------|-------------------------|---------------------|--------------------------------------------------------------------|
| 20                  | 895                           | 0.034                   | 207                 | 1.701                                                              |
| 400                 | 857.77                        | 0.034                   | 307                 | 2.042                                                              |
| 800                 | 820.54                        | 0.034                   | 407                 | 2.333                                                              |
|                     |                               |                         | 507                 | 2.598                                                              |
|                     |                               |                         | 607                 | 2.819                                                              |
|                     |                               |                         | 707                 | 3.019                                                              |
|                     |                               |                         | 807                 | 3.219                                                              |

## References

- [57] Gallas, M.R.; Piermarini, G.J. Bulk modulus and Young's modulus of nanocrystalline  $\gamma$ -alumina. *J. Am. Ceram. Soc.* **1994**, *77*, 2917–2920. <https://doi.org/10.1111/j.1151-2916.1994.tb04524.x>.
- [58] Balakrishnan, G.; Thirumurugesan, R.; Mohandas, E.; Sastikumar, D.; Kuppasami, P.; Song, J.I. Phase transition and thermal expansion studies of alumina thin films prepared by reactive pulsed laser deposition. *J. Nanosci. Nanotechnol.* **2014**, *14*, 7728–7733. <https://doi.org/10.1166/jnn.2014.9480>.
- [59] Seing, Y.; Nagai, S. Temperature dependence of the Young's modulus of diamond thin film prepared by microwave plasma chemical vapour deposition. *J. Mater. Sci. Lett.* **1993**, *12*, 324–325. <https://doi.org/10.1007/bf01910092>.
- [60] Mohr, M.; Caron, A.; Herbeck-Engel, P.; Bennewitz, R.; Gluche, P.; Brühne, K.; Fecht, H.J. Young's modulus, fracture strength, and Poisson's ratio of nanocrystalline diamond films. *J. Appl. Phys.* **2014**, *116*, 124308. <https://doi.org/10.1063/1.4896729>.
- [61] Pickrell, D.J.; Kline, K.A.; Taylor, R.E. Thermal expansion of polycrystalline diamond produced by chemical vapor deposition. *Appl. Phys. Lett.* **1994**, *64*, 2353–2355. <https://doi.org/10.1063/1.111612>.
